# Supplementary material for: Immunogenetics associated with severe coccidioidomycosis
Source: JCI journal article supplement (doi:10.1172/jci.insight.159491), 2022-09-27
Supplement: sd1 [file 1]

Supplementary Material:

Title: Immunogenetics associated with severe coccidioidomycosis

Table of Contents

|                                                                                                                                        |    |
|----------------------------------------------------------------------------------------------------------------------------------------|----|
| Supplemental Figure S1. Fold enrichment of CLEC7A, c.714T>G; p.Y238* genotype in DCM compared to gnomAD.....                           | 2  |
| Supplemental Figure S2. Structure of murine DECTIN-1 C-type lectin domain.....                                                         | 3  |
| Supplemental Figure S3. PBMC cytokine production from healthy controls or DCM patients with and without DECTIN-1 pathway variants..... | 4  |
| Supplemental Figure S4. Coccidioidomycosis disease presentation by ancestry.....                                                       | 6  |
| Supplemental Figure S5. Log <sub>10</sub> DUOX1/DUOX1A1 variant frequency in DCM cohorts and gnomAD.....                               | 7  |
| Supplemental Figure S6. DUOX1/DUOX1A1 produces H <sub>2</sub> O <sub>2</sub> after DECTIN-1 engagement.....                            | 8  |
| Supplemental Figure S7. Normal neutrophil ROS in DECTIN-1 Y238* individual.....                                                        | 9  |
| Supplemental Table S4. Overrepresentation of DUOX1/DUOX1A1 variants by ancestry.....                                                   | 10 |

Supplemental Figure S1. Fold enrichment of *CLEC7A*, c.714T>G; p.Y238\* genotype in DCM compared to gnomAD.

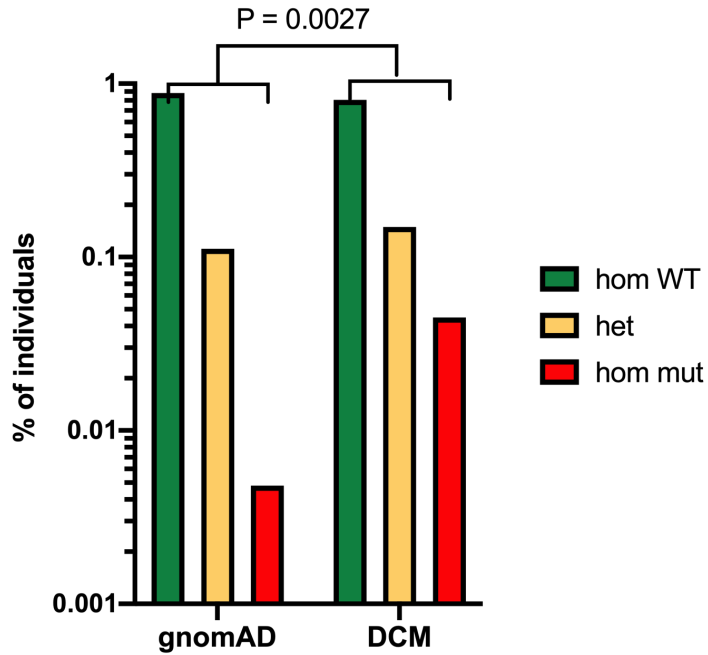

Frequency of *CLEC7A*, c.714T>G genotype in DCM normalized to gnomAD database frequency.

Using frequency of each genotype in gnomAD as 1, there is a significant increase in the proportion of the cohort homozygous for Y238\* (P=0.0027 Fisher's Exact comparing homozygous genotypes between DCM and gnomAD).

Supplemental Figure S2. Structure of murine DECTIN-1 C-type lectin domain

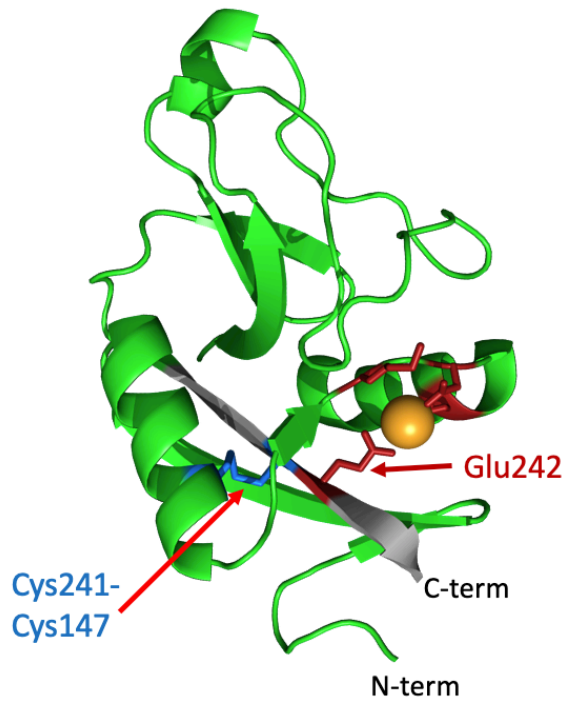

Murine DECTIN-1 C-type lectin domain (PDB ID 2BPE)<sup>19</sup>. Amino acids deleted by Y238\* are shown in grey, residues forming disulfide bonds (blue) and binding Ca<sup>2+</sup> (red) are highlighted.

Supplemental Figure S3. PBMC cytokine production from healthy controls or DCM patients with and without DECTIN-1 pathway variants.

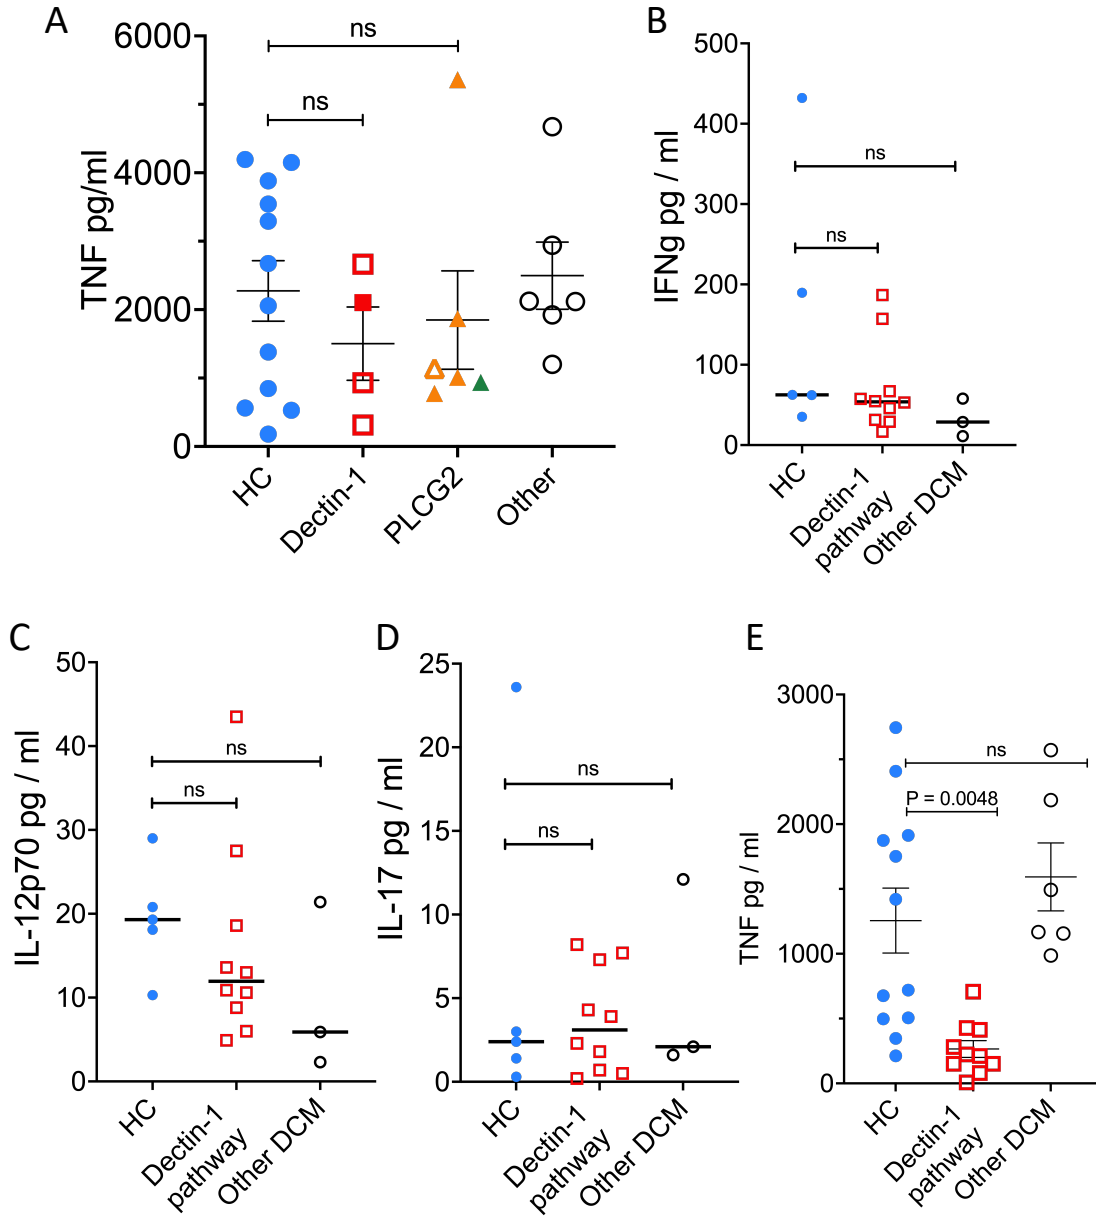

A. LPS-induced TNF production was measured by ELISA. Individuals are grouped as healthy controls, DECTIN-1 or PLCG2 variants or “Other” for those DCM patients without an identified variant. B.  $\beta$ -glucan induced IFN $\gamma$  production. Individuals are grouped as in A. C.  $\beta$ -glucan induced IL-12p70 production. Individuals are grouped as in A. D.  $\beta$ -glucan induced IL-17

production. Individuals are grouped as in A. D. Data from Figure 1F grouping DCM patients with DECTIN-1 pathway variants together. P values calculated using Brown-Forsythe and Welch ANOVA.

Supplemental Figure S4. Coccidioidomycosis disease presentation by ancestry

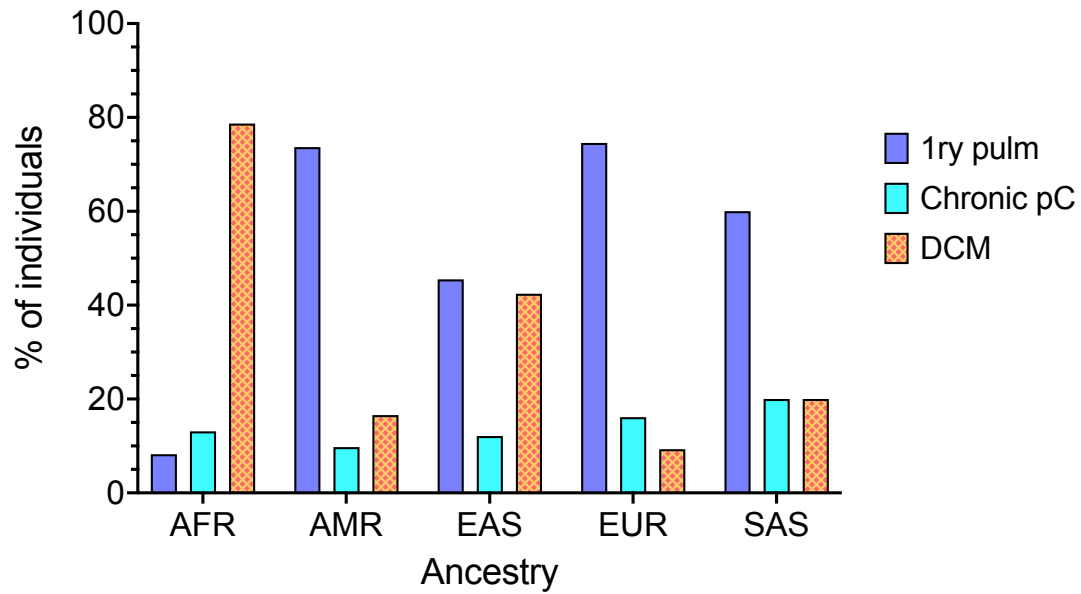

Disease presentation of individuals from validation cohort grouped by genetically determined ancestry. Presentations include primary pulmonary (1ry pulm), chronic pulmonary (Chronic pC) and disseminated disease (DCM).

Supplemental Figure S5. Log<sub>10</sub> DUOX1/DUOXA1 variant frequency in DCM cohorts and gnomAD

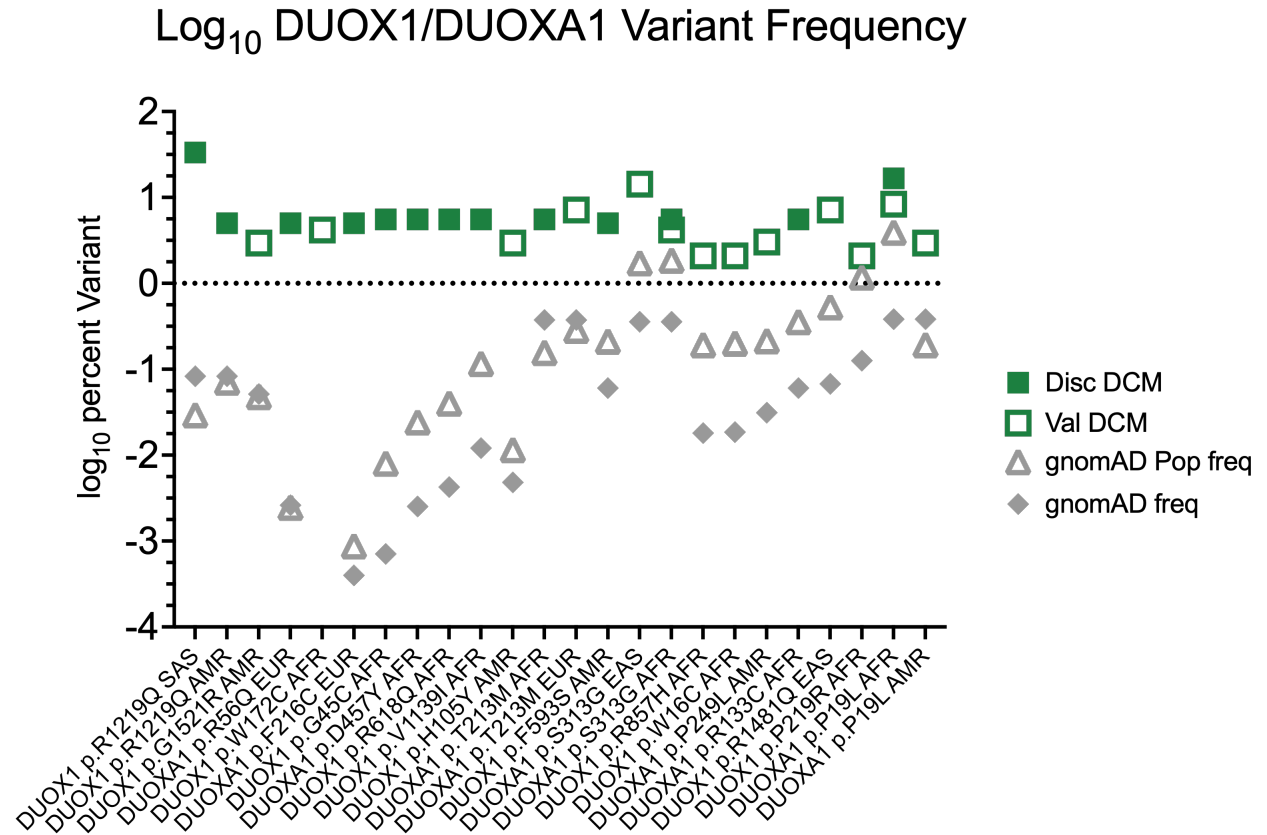

Variant frequencies from discovery (Disc DCM) and validation (Val DCM) compared to gnomAD v2.1 ancestry-specific population frequency (gnomAD Pop freq) or total gnomAD v2.1 samples (gnomAD freq).

Supplemental Figure S6. DUOX1/DUOXA1 produces H<sub>2</sub>O<sub>2</sub> after DECTIN-1 engagement.

A.

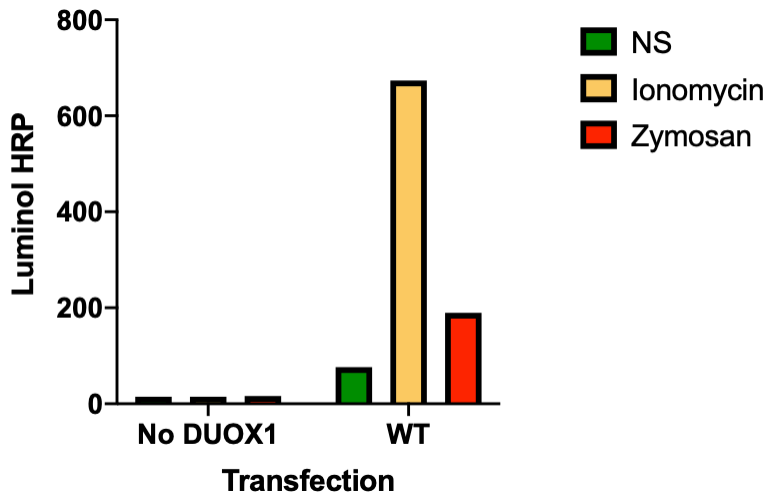

B.

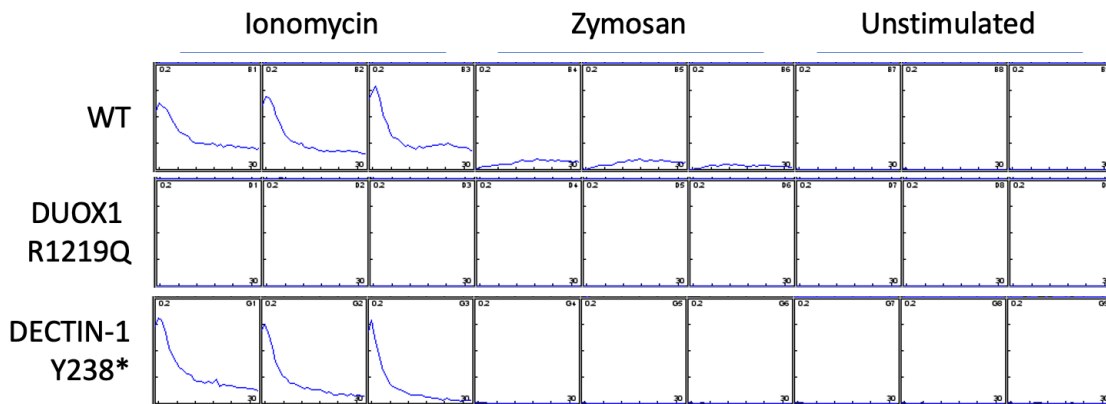

HEK-293 cells were transiently transfected with DUOX1, DUOXA1, DECTIN-1 and PLCG2 expression constructs. 48 hours later cells were stimulated or not with Ionomycin (100 ng) or depleted Zymosan (100  $\mu$ g). H<sub>2</sub>O<sub>2</sub> production was measured for 60 minutes. A. Cumulative H<sub>2</sub>O<sub>2</sub> production from transfected cells. Data is average of triplicate wells from one representative experiment. B. Kinetics of H<sub>2</sub>O<sub>2</sub> production. Graphs show kinetics of H<sub>2</sub>O<sub>2</sub> production in triplicate wells from one representative experiment.



Supplemental Figure S7. Normal neutrophil ROS in DECTIN-1 Y238\* individual

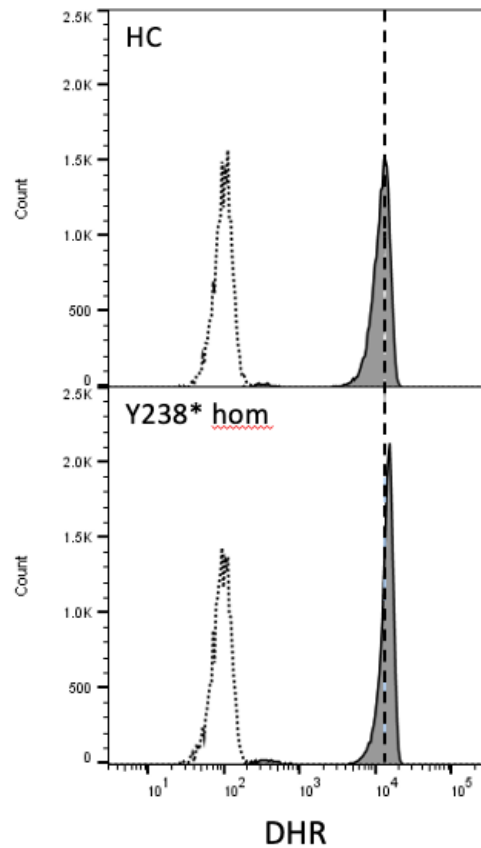

Neutrophil dihydrorhodamine oxidation (DHR) from a healthy control (HC) or an individual homozygous for DECTIN-1 Y238\*. Neutrophil populations were gated using forward and right-angle light scattering. Open histograms – neutrophil ROS production with buffer under basal conditions; solid histograms – neutrophil ROS production in response to PMA (400 ng/mL). The vertical dashed line represents the peak of PMA-treated neutrophils. Representative histogram from one of five DECTIN-1 Y238\* patients evaluated.

Supplemental Table S4. DUOX1/DUOX1A1 variants overrepresentation by ancestry

| Gene    | Variant  | CADD  | Ancestry | Disc DCM | Val DCM | gnomAD Pop count* | P value@          | gnomAD Pop freq& | gnomAD freq <sup>§</sup> | LOF            |
|---------|----------|-------|----------|----------|---------|-------------------|-------------------|------------------|--------------------------|----------------|
| DUOX1   | p.R1219Q | 23    | SAS      | 1/3      |         | 9/15308           | <b>0.002</b>      | 0.000294         | 0.0008273                | y <sup>#</sup> |
| DUOX1   | p.R1219Q | 23    | AMR      | 1/20     |         | 25/17720          | <b>0.0289</b>     | 0.0007054        | 0.0008273                | y              |
| DUOX1   | p.G1521R | 28.6  | AMR      |          | 1/34    | 17/17717          | <b>0.0339</b>     | 0.0004798        | 0.000514                 | y              |
| DUOX1A1 | p.R56Q   | 33    | EUR      | 1/20     |         | 3/61134           | <b>0.0013</b>     | 0.00002454       | 0.00002611               | y              |
| DUOX1   | p.W172C  | 27.8  | AFR      |          | 2/48    | 0/20737           | <b>&lt;0.0001</b> | 0                | 0                        |                |
| DUOX1A1 | p.F216C  | 23.7  | EUR      | 1/20     |         | 1/56870           | <b>0.0007</b>     | 0.000008792      | 0.000003977              |                |
| DUOX1   | p.G45C   | 27.3  | AFR      | 1/18     |         | 2/12474           | <b>0.0043</b>     | 0.00008017       | 0.00000708               |                |
| DUOX1A1 | p.D457Y  | 21.9  | AFR      | 1/18     |         | 6/12378           | <b>0.0101</b>     | 0.0002424        | 0.00002525               |                |
| DUOX1   | p.R618Q  | 19.8  | AFR      | 1/18     |         | 10/12476          | <b>0.0157</b>     | 0.0004008        | 0.00004247               |                |
| DUOX1   | p.V1139I | 17.44 | AFR      | 1/18     |         | 29/12473          | <b>0.0424</b>     | 0.001163         | 0.0001204                |                |
| DUOX1   | p.H105Y  | 24.9  | AMR      |          | 1/34    | 4/17268           | <b>0.0098</b>     | 0.0001158        | 0.0000482                |                |
| DUOX1A1 | p.T213M  | 27.3  | AFR      | 1/18     |         | 39/12472          | <i>0.0561</i>     | 0.001564         | 0.003756                 |                |
| DUOX1A1 | p.T213M  | 27.3  | EUR      |          | 1/15    | 362/64553         | <i>0.0811</i>     | 0.002835         | 0.003756                 |                |
| DUOX1   | p.F593S  | 22.4  | AMR      | 1/20     |         | 75/17712          | <i>0.0824</i>     | 0.002117         | 0.0006047                |                |
| DUOX1A1 | p.S313G  | 23.1  | EAS      |          | 2/14    | 344/9976          | <i>0.0827</i>     | 0.01734          | 0.003572                 |                |
| DUOX1A1 | p.S313G  | 23.1  | AFR      | 1/18     | 2/48    | 457/12473         | 0.4898            | 0.01859          | 0.003572                 |                |
| DUOX1   | p.R857H  | 24.2  | AFR      |          | 1/48    | 48/12484          | 0.1717            | 0.001922         | 0.0001803                |                |
| DUOX1   | p.W16C   | 22.2  | AFR      |          | 1/48    | 50/12505          | 0.1778            | 0.002007         | 0.0001851                |                |
| DUOX1A1 | p.P249L  | 21.8  | AMR      |          | 1/33    | 76/17713          | 0.1375            | 0.002145         | 0.0003113                |                |
| DUOX1A1 | p.R133C  | 25.2  | AFR      | 1/18     |         | 89/12471          | 0.1221            | 0.003568         | 0.0006048                |                |
| DUOX1   | p.R1481Q | 27.6  | EAS      |          | 1/14    | 106/9977          | 0.14              | 0.005312         | 0.0006753                |                |

|        |         |      |     |      |      |           |         |          |          |
|--------|---------|------|-----|------|------|-----------|---------|----------|----------|
| DUOX1  | p.P219R | 24.6 | AFR |      | 1/48 | 189/8063  | >0.9999 | 0.01178  | 0.001257 |
| DUOXA1 | p.P19L  | 22.1 | AFR | 3/18 | 4/48 | 954/12453 | 0.1557  | 0.03919  | 0.003831 |
| DUOXA1 | p.P19L  | 22.1 | AMR |      | 1/34 | 68/17641  | 0.1246  | 0.001927 | 0.003831 |

\* Number of variant positive individuals / Number of individuals sequenced for given ancestry-specific population

@ Fishers exact test for population frequency between DCM cohort and ancestry-specific population in gnomAD v2.1. P < 0.05 denoted in **bold**, P < 0.10 in *italics*.

& Frequency of variant alleles in ancestry-specific population in gnomAD v2.1

§ Frequency of variant alleles in gnomAD v2.1

# Demonstrated loss of function in heterologous overexpression assay
